# Supplementary material for: Nuclear RNA Sequencing of the Mouse Erythroid Cell Transcriptome
Source: PLoS One. 2012 Nov 29;7(11):e49274. doi: 10.1371/journal.pone.0049274 (PMC3510205; doi:10.1371/journal.pone.0049274)
Supplement: Table S3 — Gene Ontology term enrichments for B, T and BT gene classes. (XLSX) [file pone.0049274.s015.xlsx]

## Sheet: Sheet1
Supplemental table S3: Gene Ontology term enrichments for B, T and BT gene classes
Class B:
Term	Count	%	PValue	Bonferroni	Benjamini	FDR
GO:0003723~RNA binding	32	0.1345	2.13e-13	5.76e-10	5.76e-10	3.79e-10
rna-binding	24	0.1008	2.64e-11	2.29e-08	7.64e-09	4.1e-08
GO:0003676~nucleic acid binding	58	0.2437	3.05e-05	0.079299	0.020443	0.05435
ribonucleoprotein	24	0.1008	2.4e-15	2.12e-12	2.12e-12	3.79e-12
GO:0030529~ribonucleoprotein complex	28	0.1176	1.27e-13	9.94e-11	9.94e-11	1.94e-10
mmu03010:Ribosome	16	0.0672	1.63e-13	3.17e-11	3.17e-11	2.03e-10
GO:0005840~ribosome	18	0.0756	6.55e-12	5.13e-09	2.57e-09	1e-08
GO:0003735~structural constituent of ribosome	18	0.0756	8.49e-12	2.3e-08	1.15e-08	1.51e-08
ribosomal protein	18	0.0756	9.82e-12	8.51e-09	4.26e-09	1.52e-08
GO:0044249~cellular biosynthetic process	33	0.1387	3.29e-09	1.71e-05	8.53e-06	6.28e-06
GO:0009059~macromolecule biosynthetic process	28	0.1176	9.08e-09	4.72e-05	1.57e-05	1.74e-05
GO:0009058~biosynthetic process	35	0.1471	2.89e-07	0.001497	0.000374	0.000551
GO:0032991~macromolecular complex	46	0.1933	1.11e-06	0.000867	0.000174	0.001694
GO:0015935~small ribosomal subunit	6	0.0252	2.33e-05	0.018086	0.001403	0.035633
GO:0043232~intracellular non-membrane-bound organelle	32	0.1345	0.000142	0.10509	0.0079	0.216579
GO:0022613~ribonucleoprotein complex biogenesis and assembly	10	0.042	0.000399	0.874314	0.147461	0.760296
GO:0006412~translation	25	0.105	3.29e-10	1.71e-06	1.71e-06	6.28e-07
GO:0044249~cellular biosynthetic process	33	0.1387	3.29e-09	1.71e-05	8.53e-06	6.28e-06
GO:0009059~macromolecule biosynthetic process	28	0.1176	9.08e-09	4.72e-05	1.57e-05	1.74e-05
GO:0009058~biosynthetic process	35	0.1471	2.89e-07	0.001497	0.000374	0.000551
GO:0044267~cellular protein metabolic process	59	0.2479	6.98e-07	0.003615	0.000724	0.001333
GO:0044260~cellular macromolecule metabolic process	59	0.2479	1.1e-06	0.005713	0.000954	0.002108
GO:0019538~protein metabolic process	59	0.2479	3.24e-06	0.01668	0.0024	0.00619
GO:0044237~cellular metabolic process	100	0.4202	1.58e-05	0.078943	0.009095	0.030256
GO:0043170~macromolecule metabolic process	90	0.3782	2.84e-05	0.136932	0.014618	0.054176
GO:0044238~primary metabolic process	96	0.4034	0.000233	0.701709	0.10414	0.444164
GO:0009987~cellular process	143	0.6008	0.000262	0.743063	0.107067	0.498824
GO:0008152~metabolic process	102	0.4286	0.000876	0.989437	0.261669	1.66058
GO:0051082~unfolded protein binding	7	0.0294	0.000133	0.302	0.0582	0.236
GO:0006457~protein folding	9	0.0378	0.00141	0.999	0.35	2.66
chaperone	7	0.0294	0.00177	0.784379	0.111	2.70769
GO:0007049~cell cycle	18	0.0756	0.001378	0.999224	0.360808	2.6007
GO:0022402~cell cycle process	15	0.063	0.003	1	0.541614	5.57929
GO:0000074~regulation of progression through cell cycle	11	0.0462	0.004606	1	0.663604	8.4423
GO:0051726~regulation of cell cycle	11	0.0462	0.00487	1	0.667835	8.90627
GO:0045786~negative regulation of progression through cell cycle	5	0.021	0.052033	1	0.996911	63.9744
stress response	5	0.021	0.001372	0.695811	0.094416	2.1068
GO:0006457~protein folding	9	0.0378	0.00141	0.999	0.35	2.66
GO:0051789~response to protein stimulus	5	0.021	0.00502	1	0.648	9.17
GO:0006986~response to unfolded protein	5	0.021	0.00502	1	0.648424	9.16883
GO:0042221~response to chemical stimulus	10	0.042	0.0742	1	0.998994	77.0768
GO:0009607~response to biotic stimulus	6	0.0252	0.128	1	0.999943	92.7458
Class T:
Term	Count	%	PValue	Bonferroni	Benjamini	FDR
GO:0006412~translation	22	0.1063	4.77e-08	0.000248	0.000248	9.12e-05
GO:0009059~macromolecule biosynthetic process	24	0.1159	2.15e-06	0.011093	0.005562	0.004105
GO:0044249~cellular biosynthetic process	27	0.1304	6.19e-06	0.031649	0.010663	0.011834
GO:0003735~structural constituent of ribosome	11	0.0531	1.24e-05	0.032999	0.032999	0.022078
protein biosynthesis	10	0.0483	1.38e-05	0.011876	0.011876	0.021374
ribosomal protein	11	0.0531	1.87e-05	0.01608	0.005389	0.028999
GO:0044267~cellular protein metabolic process	55	0.2657	1.92e-05	0.094964	0.019758	0.036711
GO:0009058~biosynthetic process	31	0.1498	2.02e-05	0.099647	0.017343	0.03862
GO:0044260~cellular macromolecule metabolic process	55	0.2657	2.84e-05	0.137316	0.02088	0.05434
mmu03010:Ribosome	9	0.0435	3.04e-05	0.005907	0.005907	0.037913
GO:0005840~ribosome	11	0.0531	3.2e-05	0.024806	0.008338	0.049038
ribonucleoprotein	12	0.058	5.61e-05	0.047438	0.009673	0.086917
ribosome	5	0.0242	6.51e-05	0.054913	0.009369	0.100999
GO:0006996~organelle organization and biogenesis	26	0.1256	0.000707	0.974591	0.307373	1.3424
GO:0030529~ribonucleoprotein complex	14	0.0676	0.001322	0.64563	0.0767	2.00539
Class BT:
Term	Count	%	PValue	Bonferroni	Benjamini	FDR
GO:0000786~nucleosome	17	0.1429	1.6e-22	1.25e-19	1.25e-19	2.45e-19
GO:0006334~nucleosome assembly	17	0.1429	4.69e-21	2.43e-17	2.43e-17	8.96e-18
GO:0031497~chromatin assembly	17	0.1429	8.67e-20	4.5e-16	2.25e-16	1.66e-16
GO:0065004~protein-DNA complex assembly	17	0.1429	3.45e-18	1.79e-14	5.97e-15	6.59e-15
GO:0006333~chromatin assembly or disassembly	17	0.1429	1.86e-17	9.64e-14	2.41e-14	3.55e-14
Chromosomal protein	17	0.1429	2.05e-17	1.78e-14	1.78e-14	3.18e-14
GO:0065003~macromolecular complex assembly	24	0.2017	2.44e-17	1.27e-13	2.54e-14	4.67e-14
GO:0022607~cellular component assembly	25	0.2101	5.79e-17	5.76e-13	9.6e-14	2.11e-13
GO:0000785~chromatin	17	0.1429	2.16e-15	1.65e-12	8.27e-13	3.23e-12
Nucleosome core	12	0.1008	4.12e-15	3.56e-12	1.78e-12	6.37e-12
GO:0032991~macromolecular complex	44	0.3697	2.1e-14	1.65e-11	5.48e-12	3.21e-11
GO:0044427~chromosomal part	19	0.1597	5.62e-14	4.4e-11	1.1e-11	8.6e-11
GO:0006325~establishment and/or maintenance of chromatin architecture	18	0.1513	4.09e-13	2.12e-09	3.03e-10	7.81e-10
GO:0006323~DNA packaging	18	0.1513	6.15e-13	3.2e-09	3.99e-10	1.18e-09
GO:0005694~chromosome	19	0.1597	1.08e-12	8.5e-10	1.7e-10	1.66e-09
IPR007125:Histone core	10	0.084	1.11e-12	6.53e-09	6.53e-09	2.15e-09
GO:0006996~organelle organization and biogenesis	31	0.2605	9.37e-12	4.86e-08	5.4e-09	1.79e-08
acetylation	22	0.1849	1.87e-11	1.62e-08	5.41e-09	2.9e-08
GO:0051276~chromosome organization and biogenesis	19	0.1597	1.9e-11	9.85e-08	9.85e-09	3.62e-08
GO:0043232~intracellular non-membrane-bound organelle	33	0.2773	6.35e-11	4.98e-08	8.3e-09	9.73e-08
GO:0043228~non-membrane-bound organelle	33	0.2773	6.35e-11	4.98e-08	8.3e-09	9.73e-08
IPR009072:Histone-fold	9	0.0756	4.13e-10	2.42e-06	1.21e-06	7.99e-07
GO:0016043~cellular component organization and biogenesis	42	0.3529	8.75e-10	4.54e-06	4.13e-07	1.67e-06
GO:0043234~protein complex	33	0.2773	1.75e-09	1.37e-06	1.71e-07	2.68e-06
Methylation	12	0.1008	6.48e-09	5.62e-06	1.4e-06	1.01e-05
GO:0006259~DNA metabolic process	20	0.1681	1.42e-08	7.38e-05	6.15e-06	2.72e-05
dna-binding	26	0.2185	1.9e-07	0.000165	3.29e-05	0.000295
GO:0044446~intracellular organelle part	36	0.3025	2.06e-07	0.000161	1.79e-05	0.000315
Porphyrin biosynthesis	4	0.0336	1.74e-05	0.015	0.001678	0.027037
heme biosynthesis	4	0.0336	2.48e-05	0.021267	0.001952	0.038453
GO:0006783~heme biosynthetic process	4	0.0336	7.04e-05	0.30625	0.022594	0.134463
GO:0042168~heme metabolic process	4	0.0336	0.000215	0.672426	0.051757	0.409851
GO:0033013~tetrapyrrole metabolic process	4	0.0336	0.000288	0.775703	0.062924	0.548556
GO:0006778~porphyrin metabolic process	4	0.0336	0.000288	0.775703	0.062924	0.548556
GO:0051188~cofactor biosynthetic process	5	0.042	0.005505	1	0.429917	10.0097
GO:0046483~heterocycle metabolic process	4	0.0336	0.011197	1	0.610534	19.3575
GO:0051186~cofactor metabolic process	5	0.042	0.043843	1	0.93113	57.5387
GO:0065008~regulation of biological quality	14	0.1176	0.000324	0.814042	0.065075	0.617134
IPR014034:Ferritin, central	3	0.0252	0.000342	0.865519	0.249202	0.659155
GO:0055072~iron ion homeostasis	4	0.0336	0.000478	0.916332	0.08779	0.908794
GO:0006879~cellular iron ion homeostasis	4	0.0336	0.000478	0.916332	0.08779	0.908794
Iron storage	3	0.0252	0.000532	0.369661	0.028432	0.822303
PIRSF002559:ferritin	3	0.0252	0.000558	0.826256	0.583174	1.00482
domain:Ferritin-like diiron	3	0.0252	0.000699	0.999966	0.994147	1.47142
IPR001519:Ferritin, N-terminal	3	0.0252	0.000946	0.996131	0.426198	1.81431
IPR008331:Ferritin and Dps	3	0.0252	0.000946	0.996131	0.426198	1.81431
IPR012347:Ferritin-related	3	0.0252	0.000946	0.996131	0.426198	1.81431
IPR009040:Ferritin-like	3	0.0252	0.000946	0.996131	0.426198	1.81431
